# Supplementary material
Source: publisher figshare collection journal article supplement (https://acs.figshare.com/ndownloader/files/31425958)
Supplement: Supplementary file 1 [file 31425958]

**Table S1.** Details on limit and dose-response test results.

| Familie | Abr           | Limit test results     |                       |                               |                               |                      |      |                      | Dose-response test results |                   |           |                 |            |                  |                |                      |
|---------|---------------|------------------------|-----------------------|-------------------------------|-------------------------------|----------------------|------|----------------------|----------------------------|-------------------|-----------|-----------------|------------|------------------|----------------|----------------------|
|         |               | Mortality <sup>a</sup> | Adhesion <sup>a</sup> | %1B <sup>+</sup> <sup>b</sup> | %3B <sup>+</sup> <sup>b</sup> | Avidity <sup>b</sup> | nb.* | Scoring <sup>c</sup> | Log(EC50)                  | IC95%             | EC50 (mM) | IC95%           | Hill Slope | IC95%            | R <sup>2</sup> | Ranking <sup>d</sup> |
| TBP     | TBP S-Pro     | ns                     | ns                    | ns                            | ns                            | *                    | 1    | <b>7%</b>            | nd                         | nd                | nd        | nd              | nd         | nd               | nd             | <b>#10</b>           |
| TBP     | TBP D-Glu     | ns                     | ns                    | ns                            | ns                            | **                   | 2    | <b>13%</b>           | nd                         | nd                | nd        | nd              | nd         | nd               | nd             | <b>#9</b>            |
| TBP     | TBP Suc       | ns                     | ***                   | ns                            | *                             | **                   | 6    | <b>40%</b>           | nd                         | nd                | nd        | nd              | nd         | nd               | nd             | <b>#6</b>            |
| TBP     | TBP L-Lact    | ns                     | ns                    | ns                            | ns                            | ns                   | 0    | <b>0%</b>            | nd                         | nd                | nd        | nd              | nd         | nd               | nd             | <b>#11</b>           |
| TBP     | TBP Pyr       | ns                     | *                     | ns                            | ns                            | ns                   | 1    | <b>7%</b>            | nd                         | nd                | nd        | nd              | nd         | nd               | nd             | <b>#10</b>           |
| TBP     | TBP L-Tart    | ns                     | **                    | ns                            | ns                            | *                    | 3    | <b>20%</b>           | nd                         | nd                | nd        | nd              | nd         | nd               | nd             | <b>#8</b>            |
| TBP     | TBP L-Mal     | ns                     | *                     | ns                            | ns                            | *                    | 2    | <b>13%</b>           | nd                         | nd                | nd        | nd              | nd         | nd               | nd             | <b>#9</b>            |
| TBP     | TBP Malo      | ns                     | ns                    | ns                            | ns                            | *                    | 1    | <b>7%</b>            | nd                         | nd                | nd        | nd              | nd         | nd               | nd             | <b>#10</b>           |
| TBP     | TBP Br        | ns                     | ns                    | ns                            | ns                            | **                   | 2    | <b>13%</b>           | nd                         | nd                | nd        | nd              | nd         | nd               | nd             | <b>#9</b>            |
| TBP     | TBP Lev       | ns                     | ns                    | ***                           | ***                           | ***                  | 9    | <b>60%</b>           | nd                         | nd                | nd        | nd              | nd         | nd               | nd             | <b>#5</b>            |
| TBA     | TBA Lact      | ns                     | ns                    | ns                            | *                             | ***                  | 4    | <b>27%</b>           | nd                         | nd                | nd        | nd              | nd         | nd               | nd             | <b>#7</b>            |
| Bet     | Bet-C8-Lac    | ***                    | ***                   | ***                           | ***                           | **                   | 14   | <b>93%</b>           | 0.637                      | [0.583 – 0.691]   | 4.336     | [3.832 – 4.906] | 8.275      | [0.096 – 16.45]  | 0.986          | <b>#3</b>            |
| Bet     | Bet-AMC12-Lac | ***                    | ***                   | **                            | ***                           | ***                  | 14   | <b>93%</b>           | -0.926                     | [-0.991 – -0.861] | 0.119     | [0.102 – 0.138] | 1.358      | [0.967 – 1.749]  | 0.981          | <b>#1</b>            |
| Bet     | Bet           | ns                     | ns                    | ns                            | ***                           | ns                   | 3    | <b>20%</b>           | nd                         | nd                | nd        | nd              | nd         | nd               | nd             | <b>#8</b>            |
| Bet     | BetO-C12-Lac  | n/a                    | n/a                   | n/a                           | n/a                           | n/a                  | n/a  | <b>n/a</b>           | n/a                        | n/a               | n/a       | n/a             | n/a        | n/a              | n/a            | <b>n/a</b>           |
| Bet     | BetO-C8-Lac   | n/a                    | n/a                   | n/a                           | n/a                           | n/a                  | n/a  | <b>n/a</b>           | n/a                        | n/a               | n/a       | n/a             | n/a        | n/a              | n/a            | <b>n/a</b>           |
| Cho     | Cho-C12-Lact  | ***                    | ***                   | **                            | ***                           | ***                  | 14   | <b>93%</b>           | -0.584                     | [-0.649 – -0.518] | 0.261     | [0.224 – 0.304] | 6.553      | [-5.321 – 18.43] | 0.969          | <b>#2</b>            |
| Cho     | Cho-Cl        | ns                     | ns                    | ns                            | ns                            | ns                   | 0    | <b>0%</b>            | nd                         | nd                | nd        | nd              | nd         | nd               | nd             | <b>#11</b>           |
| Cho     | Cho-C8-Lact   | ***                    | ***                   | ns                            | ***                           | ***                  | 12   | <b>80%</b>           | nd                         | nd                | nd        | nd              | nd         | nd               | nd             | <b>#4</b>            |
| Cho     | Cho-C6-Lact   | ns                     | ns                    | ns                            | *                             | ns                   | 1    | <b>7%</b>            | nd                         | nd                | nd        | nd              | nd         | nd               | nd             | <b>#10</b>           |
| Cho     | Cho-C6-Lev    | ns                     | ns                    | ns                            | ns                            | *                    | 1    | <b>7%</b>            | nd                         | nd                | nd        | nd              | nd         | nd               | nd             | <b>#10</b>           |

\*, p<0.05; \*\*, p<0.01; \*\*\*, p<0.001 in comparison to the corresponding control; ns, not significant; n/a, not available; nd, not determined.

<sup>a</sup>, for cell mortality and adhesion, only inductions in comparison to the control are considered.

<sup>b</sup>, for phagocytosis endpoints, only inhibitions in comparison to the control are considered.

<sup>c</sup>, for each IL, the score represents the total number of asterisks expressed as a percentage of the maximal possible number of asterisks (ie. 5 endpoints x 3 asterisks = 15).

<sup>d</sup>, ILs ranking according to measured toxicity based on the score calculated for each substance (#1 most toxic, #11 not toxic). When available, the estimated EC50 values was used to rank ILs showing similar score.
